# Supplementary material for: The Neon Fruit Illusion: A Fresh Recipe for Colour Science Demonstrations
Source: Perception. 2019 Feb 7;48(3):242–7. doi: 10.1177/0301006618824484 (PMC6555084; doi:10.1177/0301006618824484)
Supplement: Supplemental material for The Neon Fruit Illusion: A Fresh Recipe for Colour Science Demonstrations [file Supplemental_Table1.csv]

	Illuminant	Pepper A	Pepper B	Illuminant	Pepper A	Pepper B	Illuminant	Pepper A	Pepper B
	White	White	White	Green	Green	Green	Green+Red	Green+Red	Green+Red
x chromaticity (CIE 1931)	0.30	0.54	0.34	0.16	0.21	0.19	0.28	0.60	0.27
y chromaticity (CIE 1931)	0.30	0.32	0.45	0.71	0.68	0.73	0.61	0.38	0.66
Luminance [cd/m2]	271.96	19.81	29.09	99.77	2.74	11.19	112.26	7.33	12.09
Wavelength [nm]	Radiance [mW/cm2/sr/nm]	Radiance [mW/cm2/sr/nm]	Radiance [mW/cm2/sr/nm]	Radiance [mW/cm2/sr/nm]	Radiance [mW/cm2/sr/nm]	Radiance [mW/cm2/sr/nm]	Radiance [mW/cm2/sr/nm]	Radiance [mW/cm2/sr/nm]	Radiance [mW/cm2/sr/nm]
380	0.000277	0.000019	0.000011	0.000122	0.000000	0.000011	0.000041	0.000018	0.000003
385	0.000258	0.000017	0.000007	0.000069	0.000000	0.000002	0.000059	0.000014	0.000004
390	0.000203	0.000022	0.000008	0.000048	0.000000	0.000000	0.000052	0.000003	0.000002
395	0.000196	0.000016	0.000011	0.000054	0.000000	0.000000	0.000050	0.000006	0.000000
400	0.000168	0.000023	0.000006	0.000030	0.000000	0.000000	0.000051	0.000003	0.000004
405	0.000213	0.000021	0.000009	0.000023	0.000001	0.000000	0.000044	0.000000	0.000000
410	0.000368	0.000020	0.000019	0.000011	0.000003	0.000000	0.000049	0.000000	0.000000
415	0.000758	0.000029	0.000029	0.000020	0.000004	0.000000	0.000050	0.000001	0.000000
420	0.001632	0.000049	0.000064	0.000035	0.000003	0.000000	0.000044	0.000000	0.000000
425	0.003519	0.000099	0.000127	0.000022	0.000000	0.000000	0.000044	0.000001	0.000000
430	0.007000	0.000189	0.000246	0.000032	0.000001	0.000000	0.000037	0.000000	0.000001
435	0.013259	0.000354	0.000473	0.000040	0.000004	0.000002	0.000044	0.000003	0.000003
440	0.024590	0.000654	0.000884	0.000045	0.000001	0.000007	0.000046	0.000003	0.000006
445	0.041434	0.001105	0.001519	0.000066	0.000006	0.000009	0.000057	0.000002	0.000007
450	0.056600	0.001479	0.002077	0.000087	0.000000	0.000013	0.000082	0.000005	0.000011
455	0.051954	0.001308	0.001872	0.000121	0.000005	0.000016	0.000098	0.000003	0.000010
460	0.035680	0.000875	0.001262	0.000177	0.000001	0.000017	0.000179	0.000007	0.000011
465	0.024313	0.000601	0.000863	0.000286	0.000006	0.000017	0.000282	0.000004	0.000014
470	0.017500	0.000433	0.000623	0.000488	0.000011	0.000017	0.000488	0.000013	0.000021
475	0.011969	0.000293	0.000425	0.000832	0.000023	0.000033	0.000861	0.000023	0.000030
480	0.009320	0.000229	0.000341	0.001400	0.000041	0.000054	0.001427	0.000038	0.000053
485	0.008762	0.000219	0.000325	0.002340	0.000061	0.000086	0.002370	0.000060	0.000089
490	0.009380	0.000236	0.000358	0.003871	0.000101	0.000146	0.003901	0.000099	0.000147
495	0.011134	0.000286	0.000449	0.006215	0.000163	0.000248	0.006234	0.000160	0.000252
500	0.014440	0.000376	0.000630	0.010155	0.000269	0.000445	0.010115	0.000265	0.000446
505	0.018774	0.000490	0.000932	0.015478	0.000411	0.000772	0.015351	0.000406	0.000777
510	0.023680	0.000619	0.001431	0.021745	0.000573	0.001325	0.021545	0.000573	0.001326
515	0.026988	0.000703	0.002045	0.025946	0.000679	0.001981	0.025746	0.000683	0.001981
520	0.027475	0.000711	0.002652	0.026200	0.000677	0.002540	0.026060	0.000681	0.002541
525	0.025661	0.000665	0.003016	0.022976	0.000587	0.002703	0.022900	0.000595	0.002702
530	0.023140	0.000598	0.003131	0.018570	0.000474	0.002510	0.018540	0.000479	0.002508
535	0.020914	0.000546	0.003063	0.014568	0.000373	0.002127	0.014549	0.000376	0.002121
540	0.019120	0.000508	0.002906	0.011180	0.000284	0.001692	0.011155	0.000290	0.001685
545	0.017756	0.000481	0.002756	0.008339	0.000218	0.001283	0.008320	0.000218	0.001278
550	0.016955	0.000472	0.002672	0.006145	0.000160	0.000951	0.006120	0.000163	0.000942
555	0.016612	0.000481	0.002602	0.004475	0.000123	0.000687	0.004471	0.000121	0.000685
560	0.016610	0.000505	0.002505	0.003273	0.000094	0.000485	0.003278	0.000091	0.000483
565	0.016760	0.000552	0.002337	0.002379	0.000076	0.000322	0.002389	0.000066	0.000326
570	0.017055	0.000619	0.002144	0.001739	0.000061	0.000210	0.001752	0.000056	0.000218
575	0.017523	0.000723	0.001979	0.001248	0.000050	0.000137	0.001319	0.000049	0.000149
580	0.018060	0.000887	0.001865	0.000912	0.000043	0.000095	0.001007	0.000042	0.000106
585	0.018538	0.001122	0.001779	0.000668	0.000041	0.000067	0.000836	0.000048	0.000085
590	0.018875	0.001460	0.001707	0.000497	0.000036	0.000047	0.000786	0.000063	0.000077
595	0.019049	0.001896	0.001647	0.000368	0.000034	0.000033	0.000833	0.000090	0.000081
600	0.018950	0.002458	0.001588	0.000270	0.000033	0.000023	0.001050	0.000155	0.000095
605	0.018748	0.003070	0.001507	0.000213	0.000032	0.000019	0.001508	0.000282	0.000127
610	0.018270	0.003754	0.001381	0.000166	0.000030	0.000016	0.002423	0.000584	0.000204
615	0.017632	0.004375	0.001248	0.000149	0.000034	0.000010	0.003898	0.001148	0.000305
620	0.016720	0.004950	0.001117	0.000128	0.000031	0.000011	0.006425	0.002248	0.000475
625	0.015732	0.005386	0.001022	0.000115	0.000030	0.000008	0.009767	0.003945	0.000702
630	0.014640	0.005675	0.000935	0.000115	0.000029	0.000010	0.013865	0.006100	0.000963
635	0.013488	0.005803	0.000811	0.000107	0.000027	0.000004	0.013806	0.005662	0.000807
640	0.012330	0.005770	0.000648	0.000111	0.000022	0.000007	0.007340	0.002789	0.000340
645	0.011144	0.005595	0.000505	0.000105	0.000024	0.000004	0.002847	0.001151	0.000113
650	0.010065	0.005320	0.000423	0.000101	0.000021	0.000009	0.001279	0.000536	0.000053
655	0.008961	0.004960	0.000369	0.000095	0.000025	0.000003	0.000596	0.000258	0.000028
660	0.008025	0.004591	0.000317	0.000087	0.000025	0.000008	0.000359	0.000151	0.000023
665	0.007106	0.004180	0.000282	0.000061	0.000024	0.000010	0.000229	0.000101	0.000024
670	0.006235	0.003773	0.000261	0.000060	0.000018	0.000011	0.000166	0.000076	0.000025
675	0.005527	0.003402	0.000270	0.000047	0.000020	0.000015	0.000148	0.000065	0.000029
680	0.004812	0.003020	0.000292	0.000045	0.000015	0.000019	0.000125	0.000052	0.000040
685	0.004206	0.002691	0.000321	0.000014	0.000014	0.000022	0.000102	0.000048	0.000049
690	0.003656	0.002368	0.000392	0.000015	0.000013	0.000023	0.000068	0.000043	0.000050
695	0.003166	0.002084	0.000550	0.000005	0.000014	0.000030	0.000060	0.000036	0.000049
700	0.002741	0.001835	0.000734	0.000000	0.000013	0.000028	0.000052	0.000035	0.000051
705	0.002362	0.001593	0.000876	0.000000	0.000016	0.000037	0.000038	0.000030	0.000058
710	0.002020	0.001400	0.000968	0.000000	0.000015	0.000040	0.000017	0.000029	0.000060
715	0.001751	0.001210	0.001015	0.000001	0.000011	0.000050	0.000033	0.000021	0.000068
720	0.001507	0.001048	0.001038	0.000002	0.000009	0.000057	0.000048	0.000016	0.000075
725	0.001329	0.000910	0.001035	0.000011	0.000006	0.000066	0.000043	0.000013	0.000089
730	0.001151	0.000781	0.001011	0.000020	0.000006	0.000069	0.000039	0.000007	0.000090
735	0.001020	0.000677	0.000962	0.000027	0.000002	0.000076	0.000051	0.000008	0.000097
740	0.000900	0.000577	0.000894	0.000037	0.000004	0.000074	0.000057	0.000003	0.000093
745	0.000784	0.000509	0.000809	0.000032	0.000002	0.000075	0.000054	0.000004	0.000092
750	0.000723	0.000443	0.000712	0.000025	0.000000	0.000060	0.000055	0.000000	0.000085
755	0.000653	0.000380	0.000613	0.000020	0.000000	0.000053	0.000043	0.000002	0.000073
760	0.000607	0.000343	0.000516	0.000028	0.000000	0.000047	0.000036	0.000001	0.000069
765	0.000524	0.000298	0.000445	0.000004	0.000002	0.000032	0.000014	0.000005	0.000056
770	0.000475	0.000255	0.000374	0.000000	0.000000	0.000023	0.000012	0.000011	0.000053
775	0.000423	0.000224	0.000312	0.000001	0.000004	0.000016	0.000001	0.000013	0.000038
780	0.000385	0.000200	0.000269	0.000000	0.000007	0.000014	0.000016	0.000015	0.000032
